# Supplementary material for: Incidence and prevalence of type 2 diabetes mellitus with HIV infection in Africa: a systematic review and meta-analysis
Source: PubMed Central journal article supplement — BMJ Open. 2017 Mar 29;7(3):e013953. doi: 10.1136/bmjopen-2016-013953 (PMC5372101; doi:10.1136/bmjopen-2016-013953), 2017-03-29
Supplement: bmjopen-2016-013953supp1.pdf [file bmjopen-2016-013953supp1.pdf]

## **Embase:421**

((HIV:ab,ti OR 'hiv infection':ab,ti OR aids:ab,ti OR 'human immunodeficiency virus':ab,ti OR 'acquired immune deficiency syndrome':ab,ti OR 'aids virus':ab,ti OR 'acquired immunodeficiency syndrome':ab,ti OR 'immunologic deficiency syndrome, acquired':ab,ti OR 'acquired immune deficiency syndrome':ab,ti OR 'acquired immune deficiency syndromes':ab,ti OR 'acquired immuno deficiency syndrome':ab,ti OR 'acquired immuno-deficiency syndrome':ab,ti OR 'htlv-iii':ab,ti OR 'htlv-iii-lav infection':ab,ti OR 'human t cell lymphotropic virus type iii':ab,ti OR 'human t-cell lymphotropic virus type iii':ab,ti OR 'human t lymphotropic virus type iii':ab,ti OR 'human t-lymphotropic virus type iii':ab,ti OR 'human t-cell leukemia virus type iii':ab,ti OR 'human t cell leukemia virus type ii':ab,ti OR 'hiv infected':ab,ti OR 'hiv-infected':ab,ti OR 'acquired immune deficiency syndrome'/exp OR 'human immunodeficiency virus'/exp OR 'AIDS patient'/exp)

AND

(diabetes:ab,ti OR 'diabetes mellitus':ab,ti OR diabetic:ab,ti OR 'impaired glucose control':ab,ti OR 'impaired glucose uptake':ab,ti OR 'impaired glucose tolerance':ab,ti OR 'glucose intolerance':ab,ti OR 'glucose tolerance':ab,ti OR 'glucose metabolism':ab,ti OR 'hyperglycaemia':ab,ti OR 'hyperglycemia':ab,ti OR 'hyperglycaemia':ab,ti OR 'glucose plasma':ab,ti OR 'plasma glucose':ab,ti OR 'blood glucose':ab,ti OR 'insulin resistance':ab,ti OR 'insulin sensitivity':ab,ti OR 'glucose tolerance test':ab,ti OR 'oral glucose tolerance':ab,ti OR 'ogtt':ab,ti OR 'intravenous glucose tolerance':ab,ti OR 'glucose day curve':ab,ti NOT 'type 1':ab,ti OR 'diabetes mellitus'/exp OR 'hyperglycemia'/exp OR 'glucose tolerance test'/exp OR 'insulin resistance'/exp)

AND

('Africa':ab,ti OR African:ab,ti OR Algeria:ab,ti OR Angola:ab,ti OR Benin:ab,ti OR Botswana:ab,ti OR 'Burkina Faso':ab,ti OR Burundi:ab,ti OR 'Cabo Verde':ab,ti OR Cameroon:ab,ti OR 'Central African Republic':ab,ti OR Chad:ab,ti OR Comoros:ab,ti OR 'Congo, Republic of the':ab,ti OR 'Congo, Democratic Republic of the':ab,ti OR 'Cote dlvoire':ab,ti OR Djibouti:ab,ti OR Egypt:ab,ti OR 'Equatorial Guinea':ab,ti OR Eritrea:ab,ti OR Ethiopia:ab,ti OR Gabon:ab,ti OR Gambia:ab,ti OR Ghana:ab,ti OR Guinea:ab,ti OR 'Guinea-Bissau':ab,ti OR Kenya:ab,ti OR Lesotho:ab,ti OR Liberia:ab,ti OR Libya:ab,ti OR Madagascar:ab,ti OR Malawi:ab,ti OR Mali:ab,ti OR Mauritania:ab,ti OR Mauritius:ab,ti OR Morocco:ab,ti OR Mozambique:ab,ti OR Namibia:ab,ti OR Niger:ab,ti OR Nigeria:ab,ti OR Rwanda:ab,ti OR 'Sao Tome and Principe':ab,ti OR Senegal:ab,ti OR Seychelles:ab,ti OR 'Sierra Leone':ab,ti OR Somalia:ab,ti OR 'South Africa':ab,ti OR 'South Sudan':ab,ti OR Sudan:ab,ti OR Swaziland:ab,ti OR Tanzania:ab,ti OR Togo:ab,ti OR Tunisia:ab,ti OR Uganda:ab,ti OR Zambia:ab,ti OR Zimbabwe:ab,ti OR 'Ivory Coast':ab,ti OR 'Africa'/exp OR 'African'/exp))

OR

((haart:ab,ti OR 'highly active anti retroviral therapy':ab,ti OR 'highly active anti retroviral therapies':ab,ti OR 'highly active anti-retroviral therapy':ab,ti OR 'highly active anti-retroviral therapies':ab,ti OR 'highly active antiretroviral therapy':ab,ti OR 'highly active antiretroviral therapies':ab,ti OR 'anti retroviral therapy':ab,ti OR 'antiretroviral therapy':ab,ti OR 'anti retroviral therapies':ab,ti OR 'antiretroviral therapies':ab,ti OR 'anti-retroviral therapy':ab,ti OR 'anti-retroviral therapies':ab,ti OR 'protease inhibitor':ab,ti OR 'protease antagonist':ab,ti OR antiprotease:ab,ti OR 'hiv protease inhibitor':ab,ti OR 'hiv antiprotease':ab,ti OR 'hiv protease antagonist':ab,ti OR 'peptidase inhibitor':ab,ti OR 'endopeptidase inhibitor':ab,ti OR 'reverse transcriptase inhibitor':ab,ti OR 'reverse-transcriptase inhibitor':ab,ti OR 'antiviral agent':ab,ti OR antiviral:ab,ti OR 'antiviral drug':ab,ti OR 'agent, anti-retroviral':ab,ti OR 'anti retroviral agent':ab,ti OR 'antiretroviral agent':ab,ti OR 'fusion inhibitor, hiv':ab,ti OR 'hiv cell fusion inhibitor':ab,ti OR 'hiv entry inhibitor':ab,ti OR 'hiv integrase inhibitor':ab,ti OR 'hiv integrase inhibitors':ab,ti OR 'ccr5 receptor antagonist':ab,ti OR 'highly active antiretroviral therapy'/exp)

AND

(diabetes:ab,ti OR 'diabetes mellitus':ab,ti OR diabetic:ab,ti OR 'impaired glucose control':ab,ti OR 'impaired glucose uptake':ab,ti OR 'impaired glucose tolerance':ab,ti OR 'glucose intolerance':ab,ti OR 'glucose tolerance':ab,ti OR 'glucose metabolism':ab,ti OR 'hyperglycaemia':ab,ti OR 'hyperglycemia':ab,ti OR 'hyperglycaemia':ab,ti OR 'glucose plasma':ab,ti OR 'plasma glucose':ab,ti OR 'blood glucose':ab,ti OR 'insulin resistance':ab,ti OR 'insulin sensitivity':ab,ti OR 'glucose tolerance test':ab,ti OR 'oral glucose tolerance':ab,ti OR 'ogtt':ab,ti OR 'intravenous glucose tolerance':ab,ti OR 'glucose day curve':ab,ti NOT 'type 1':ab,ti OR 'diabetes mellitus'/exp OR 'hyperglycemia'/exp OR 'glucose tolerance test'/exp OR 'insulin resistance'/exp)

AND

('Africa':ab,ti OR African:ab,ti OR Algeria:ab,ti OR Angola:ab,ti OR Benin:ab,ti OR Botswana:ab,ti OR 'Burkina Faso':ab,ti OR Burundi:ab,ti OR 'Cabo Verde':ab,ti OR Cameroon:ab,ti OR 'Central African Republic':ab,ti OR Chad:ab,ti OR Comoros:ab,ti OR 'Congo, Republic of the':ab,ti OR 'Congo, Democratic Republic of the':ab,ti OR 'Cote d'Ivoire':ab,ti OR Djibouti:ab,ti OR Egypt:ab,ti OR 'Equatorial Guinea':ab,ti OR Eritrea:ab,ti OR Ethiopia:ab,ti OR Gabon:ab,ti OR Gambia:ab,ti OR Ghana:ab,ti OR Guinea:ab,ti OR 'Guinea-Bissau':ab,ti OR Kenya:ab,ti OR Lesotho:ab,ti OR Liberia:ab,ti OR Libya:ab,ti OR Madagascar:ab,ti OR Malawi:ab,ti OR Mali:ab,ti OR Mauritania:ab,ti OR Mauritius:ab,ti OR Morocco:ab,ti OR Mozambique:ab,ti OR Namibia:ab,ti OR Niger:ab,ti OR Nigeria:ab,ti OR Rwanda:ab,ti OR 'Sao Tome and Principe':ab,ti OR Senegal:ab,ti OR Seychelles:ab,ti OR 'Sierra Leone':ab,ti OR Somalia:ab,ti OR 'South Africa':ab,ti OR 'South Sudan':ab,ti OR Sudan:ab,ti OR Swaziland:ab,ti OR Tanzania:ab,ti OR Togo:ab,ti OR Tunisia:ab,ti OR Uganda:ab,ti OR Zambia:ab,ti OR Zimbabwe:ab,ti OR 'Ivory Coast':ab,ti OR 'Africa'/exp OR 'African'/exp))

Filters: Published after Jan 01 2008, Human, Search field=title and abstract,  
Adolescent or adult (age>13years)
